# Supplementary material for: Chirality inversions in self-assembly of fibrillar superstructures: a computational study
Source: Royal Society of Chemistry journal article supplement (doi:10.1039/c3sm27961h), 2013-01-01
Supplement: c3sm27961h.pdf [file c3sm27961h.pdf]

# Electronic Supplementary Information (ESI)

## Force field parameters

The total bond energy is the sum of four contributions:

$$U_{bond} = U_l + U_\phi + U_\theta + U_\lambda,$$

with:

$$\begin{aligned} U_l &= \frac{k_l}{2}(l - l_0)^2 \\ U_\phi &= \frac{k_\phi}{2}(\phi - \phi_0)^2 \\ U_\theta &= 1 + a_2\theta^2 + \theta^4 + a_6\theta^6 \\ U_\lambda &= \frac{k_\lambda}{2}(|\lambda| - \lambda_0)^2 \end{aligned}$$

where  $l$  and  $\phi$  denote bond length and bond angle, respectively. Dihedral angles (see Fig. 1a in the main text) are denoted by  $\lambda$  and  $\theta$ . The parameters of the force field parameters are given in Table 1. The values of  $a_2$  and  $a_6$  were computed for each  $\theta_0$  to get the potential with minima at  $\pm\theta_0$  and a barrier height of  $\Delta E = 5/2$ .

| term             | beads affected     | parameters                        |
|------------------|--------------------|-----------------------------------|
| $U_{l_{BS}}$     | $B-S$              | $k_l = 50, l_0 = 2$               |
| $U_{l_{BB}}$     | $B-B$              | $k_l = 100, l_0 = 1$              |
| $U_{\phi_{SBB}}$ | $S-B-B$            | $k_\phi = 200, \phi_0 = 90^\circ$ |
| $U_{\phi_{BBB}}$ | $B-B-B$            | $k_\phi = 50, \phi_0 = 180^\circ$ |
| $U_\lambda$      | $S-B_iB_{i+2}-S$   | $k_\lambda = 10$                  |
| $U_\theta$       | $S1-B_iB_{i+1}-S2$ | $a_2$ and $a_6$ - see the text    |
| LJ               | $B$                | $\epsilon = 1, \sigma_B = 4$      |
| LJ               | $S1, S2$           | $\epsilon = 1, \sigma_S = 1$      |

**Table 1** Force field parameters

## Simulations

Simulations were run with the LAMMPS package in three stages:

1. Short equilibration of side strands with backbone beads' location restrained: timestep= $0.5 \times 10^{-3}t_D$ , total time= $40t_D$
2. Short molecular dynamics NVT run at  $T^* = 1.5$  in order to relax the initial configuration run to change the

initial configuration of the fibrils: timestep= $10^{-2}t_D$ , total time= $800t_D$

3. Langevin dynamics: timestep= $10^{-2}t_D$ , total time= $10^6t_D$

## Helix angle

As illustrated in Fig. 1, the helix angle,  $\alpha_0$  is the angle between the helical curve and the vertical axis. The arc  $a$  is spanned by horizontal vectors  $\rho_1$  and  $\rho_2$  with  $\lambda_0$  being the angle between them. Next,  $b$  is the axial distance between the two consecutive side strand beads. The length of arc  $a$  is therefore  $\rho\lambda_0$ , where  $\rho = |\rho_1| = |\rho_2|$  is the radius of the cylinder containing the helix. The lines  $a$  (dashed),  $b$  (dotted), and  $s$  (segment of a helix) form a right triangle, hence  $\tan(\alpha_0) = \frac{\rho\lambda_0}{b}$ . In our case  $\rho$  corresponds to  $l_{BS} = 2$ , whereas  $b$  is  $b = 2l_{BB} = 2$ . Hence,  $\tan(\alpha_0) = \lambda_0$  and  $\alpha_0 = \arctan(\lambda_0)$ .

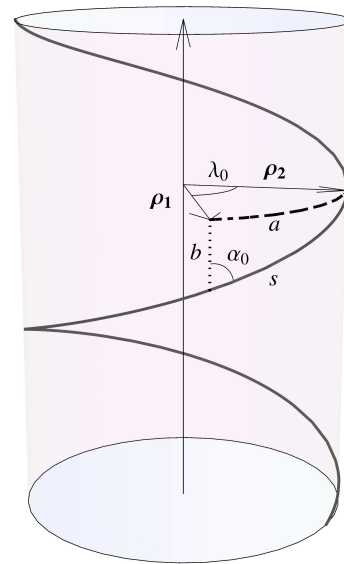

**Fig. 1** Schematic illustrating the relation between the angles  $\alpha_0$  and  $\lambda_0$ .

## Relation of the chirality, $\chi$ , to the torsion of the chain

Below we show that in the limit of a continuous curve Eq. (2) gives the local torsion of the chain. Consider a curve

parametrized by its arc length,  $s$ . and three consecutive tangent vectors  $\mathbf{t}_- = \mathbf{t}(-\varepsilon)$ ,  $\mathbf{t} = \mathbf{t}(0)$  and  $\mathbf{t}_+ = \mathbf{t}(\varepsilon)$ , separated by a distance  $\varepsilon$  along the arc length. The tangent vectors, together with the corresponding normal and binormal vectors constitute a local orthogonal trihedron fulfilling the Frenet-Serret relations

$$\begin{aligned}\mathbf{t}' &= \kappa \mathbf{n} \\ \mathbf{n}' &= -\kappa \mathbf{t} + \tau \mathbf{b} \\ \mathbf{b}' &= -\tau \mathbf{n}\end{aligned}$$

where  $\kappa$  is the curvature and  $\tau$  is the torsion of the curve. The prime denotes differentiation with respect to the arc length. For small  $\varepsilon$

$$\mathbf{t}_{\pm} = \mathbf{t} \pm \mathbf{t}'\varepsilon + \frac{1}{2}\varepsilon^2\mathbf{t}'' + \dots$$

Using Frenet-Serret formulas

$$\mathbf{t}_{\pm} = \mathbf{t} \pm \kappa \mathbf{n}\varepsilon + \frac{1}{2}\varepsilon^2(\kappa'\mathbf{n} - \kappa^2\mathbf{t} + \kappa\tau\mathbf{b}) + O(\varepsilon^3)$$

which leads to

$$\mathbf{t}_- \times \mathbf{t} = \kappa\varepsilon\mathbf{b} + \frac{1}{2}\varepsilon^2(\kappa\tau\mathbf{n} - \kappa'\mathbf{b})$$

and

$$\mathbf{t} \times \mathbf{t}_+ = \kappa\varepsilon\mathbf{b} - \frac{1}{2}\varepsilon^2(\kappa\tau\mathbf{n} - \kappa'\mathbf{b})$$

Finally

$$(\mathbf{t}_- \times \mathbf{t}) \cdot (\mathbf{t} \times \mathbf{t}_+) = \kappa^2\varepsilon^2 + \dots$$

and

$$(\mathbf{t}_- \times \mathbf{t}) \cdot \mathbf{t}_+ = \kappa^2\tau\varepsilon^3 + \dots$$

The argument of the arc tangent function in Eq. (2) is the ratio of these two terms. Thus, in the limit of small  $\varepsilon$  the expression  $\arctan 2\left(\frac{|\mathbf{v}_i|\mathbf{v}_{i-1} \cdot (\mathbf{v}_i \times \mathbf{v}_{i+1})}{(\mathbf{v}_{i-1} \times \mathbf{v}_i) \cdot (\mathbf{v}_i \times \mathbf{v}_{i+1})}\right)$  is proportional to the local (signed) torsion of the chain.
